# Supplementary material for: Selection on MHC class II supertypes in the New Zealand endemic Hochstetter’s frog
Source: PubMed Central journal article supplement (PMC4415247; doi:10.1186/s12862-015-0342-0), 2015-04-13
Supplement: 12862_2015_342_MOESM2_ESM.pdf [file 12862_2015_342_MOESM2_ESM.pdf]

### Supplementary Tables

Supplementary Table 1. Summary of Hardy-Weinberg results for 9 polymorphic microsatellite markers for each ESU. Observed heterozygosity,  $H_O$ , and expected heterozygosity,  $H_E$ . Microsatellite markers deviating from Hardy-Weinberg Equilibrium expectations indicated in bold; \* indicates non-significance after Bonferroni correction for multiple tests

| ESU                 | Locus         | $H_O$        | $H_E$          | $P$ -value     | s.d.          |
|---------------------|---------------|--------------|----------------|----------------|---------------|
| Brynderwyn Range    | <b>Lhoc05</b> | <b>0.526</b> | <b>0.626</b>   | <b>0.0191*</b> | <b>0.0001</b> |
|                     | Lhoc07        | 0.368        | 0.462          | 0.6075         | 0.0005        |
|                     | Lhoc08        | 0.053        | 0.053          | 1              | 0             |
|                     | Lhoc11        | 0.263        | 0.235          | 1              | 0             |
|                     | Lhoc13        | 0.211        | 0.193          | 1              | 0             |
|                     | Lhoc15        | 0.158        | 0.235          | 0.2588         | 0.0004        |
|                     | Lhoc19        | 0.737        | 0.738          | 0.1099         | 0.0003        |
|                     | Lhoc23        | 0.263        | 0.422          | 0.1246         | 0.0003        |
|                     | Lhoc25        | 0.368        | 0.371          | 1              | 0             |
| Northern Coromandel | Lhoc05        | 0.305        | 0.375          | 0.0622         | 0.0003        |
|                     | <b>Lhoc07</b> | <b>0.203</b> | <b>0.347</b>   | <b>0.0033*</b> | <b>0.0001</b> |
|                     | Lhoc08        | 0.119        | 0.113          | 1              | 0             |
|                     | Lhoc11        | 0.034        | 0.034          | 1              | 0             |
|                     | Lhoc13        | 0.136        | 0.160          | 0.3390         | 0.0005        |
|                     | <b>Lhoc15</b> | <b>0.102</b> | <b>0.159</b>   | <b>0.0284*</b> | <b>0.0002</b> |
|                     | <b>Lhoc19</b> | <b>0.153</b> | <b>0.249</b>   | <b>0.0113*</b> | <b>0.0001</b> |
|                     | Lhoc23        | 0.017        | 0.017          | 1              | 0             |
| <b>Lhoc25</b>       | <b>0.203</b>  | <b>0.321</b> | <b>0.0071*</b> | <b>0.0001</b>  |               |
| Central Coromandel  | Lhoc05        | 0.310        | 0.376          | 0.2406         | 0.0004        |
|                     | Lhoc07        |              | Monomorphic    |                |               |
|                     | Lhoc08        | 0.103        | 0.160          | 0.1703         | 0.0004        |
|                     | Lhoc11        | 0.345        | 0.336          | 0.1193         | 0.0003        |
|                     | Lhoc13        | 0.172        | 0.160          | 1              | 0             |
|                     | Lhoc15        |              | Monomorphic    |                |               |
|                     | Lhoc19        | 0.172        | 0.195          | 0.2516         | 0.0005        |
|                     | Lhoc23        | 0.172        | 0.163          | 1              | 0             |
|                     | Lhoc25        | 0.552        | 0.635          | 0.4946         | 0.0005        |
| Southern Coromandel | Lhoc05        | 0.429        | 0.581          | 0.0915         | 0.0003        |
|                     | Lhoc07        | 0.029        | 0.029          | 1              | 0             |
|                     | Lhoc08        |              | Monomorphic    |                |               |
|                     | Lhoc11        | 0.057        | 0.056          | 1              | 0             |
|                     | <b>Lhoc13</b> | <b>0.000</b> | <b>0.056</b>   | <b>0.0150*</b> | <b>0.0001</b> |
|                     | Lhoc15        |              | Monomorphic    |                |               |
|                     | <b>Lhoc19</b> | <b>0.029</b> | <b>0.086</b>   | <b>0.0150*</b> | <b>0.0001</b> |
|                     | Lhoc23        |              | Monomorphic    |                |               |
| <b>Lhoc25</b>       | <b>0.114</b>  | <b>0.248</b> | <b>0.0102*</b> | <b>0.0001</b>  |               |
| Otawa               | Lhoc05        |              | Monomorphic    |                |               |
|                     | Lhoc07        |              | Monomorphic    |                |               |
|                     | Lhoc08        |              | Monomorphic    |                |               |
|                     | Lhoc11        |              | Monomorphic    |                |               |
|                     | Lhoc13        |              | Monomorphic    |                |               |
|                     | Lhoc15        |              | Monomorphic    |                |               |
|                     | Lhoc19        | 0.654        | 0.491          | 0.1140         | 0.0003        |
|                     | Lhoc23        |              | Monomorphic    |                |               |
|                     | Lhoc25        |              | Monomorphic    |                |               |

Supplementary Table 2. Supertype membership of *Leiopelma hochstetteri* MHC class II-DAB alleles

| Supertype          | <i>LehoDAB</i> allele | Supertype          | <i>LehoDAB</i> allele |
|--------------------|-----------------------|--------------------|-----------------------|
| 1                  | <i>LehoDAB</i> *03    | 3                  | <i>LehoDAB</i> *42    |
|                    | <i>LehoDAB</i> *04    |                    | <i>LehoDAB</i> *44    |
|                    | <i>LehoDAB</i> *09    |                    | <i>LehoDAB</i> *45    |
|                    | <i>LehoDAB</i> *11    |                    | <i>LehoDAB</i> *46    |
|                    | <i>LehoDAB</i> *12    |                    | <i>LehoDAB</i> *48    |
|                    | <i>LehoDAB</i> *13    |                    | <i>LehoDAB</i> *52    |
|                    | <i>LehoDAB</i> *20    |                    | <i>LehoDAB</i> *53    |
|                    | <i>LehoDAB</i> *49    |                    | <i>LehoDAB</i> *56    |
|                    | <i>LehoDAB</i> *57    |                    | <i>LehoDAB</i> *58    |
|                    | <i>LehoDAB</i> *68    |                    | <i>LehoDAB</i> *59    |
| <i>LehoDAB</i> *69 | <i>LehoDAB</i> *61    |                    |                       |
| 2                  | <i>LehoDAB</i> *08    | <i>LehoDAB</i> *63 |                       |
|                    | <i>LehoDAB</i> *14    | <i>LehoDAB</i> *66 |                       |
|                    | <i>LehoDAB</i> *16    | <i>LehoDAB</i> *67 |                       |
|                    | <i>LehoDAB</i> *22    | <i>LehoDAB</i> *71 |                       |
|                    | <i>LehoDAB</i> *27    | <i>LehoDAB</i> *72 |                       |
|                    | <i>LehoDAB</i> *40    | <i>LehoDAB</i> *74 |                       |
|                    | <i>LehoDAB</i> *41    | <i>LehoDAB</i> *01 |                       |
|                    | <i>LehoDAB</i> *43    | <i>LehoDAB</i> *02 |                       |
|                    | <i>LehoDAB</i> *60    | <i>LehoDAB</i> *05 |                       |
|                    | <i>LehoDAB</i> *65    | <i>LehoDAB</i> *06 |                       |
| 3                  | <i>LehoDAB</i> *07    | 4                  | <i>LehoDAB</i> *23    |
|                    | <i>LehoDAB</i> *10    |                    | <i>LehoDAB</i> *25    |
|                    | <i>LehoDAB</i> *15    |                    | <i>LehoDAB</i> *29    |
|                    | <i>LehoDAB</i> *17    |                    | <i>LehoDAB</i> *30    |
|                    | <i>LehoDAB</i> *18    |                    | <i>LehoDAB</i> *32    |
|                    | <i>LehoDAB</i> *19    |                    | <i>LehoDAB</i> *34    |
|                    | <i>LehoDAB</i> *21    |                    | <i>LehoDAB</i> *39    |
|                    | <i>LehoDAB</i> *24    |                    | <i>LehoDAB</i> *47    |
|                    | <i>LehoDAB</i> *26    |                    | <i>LehoDAB</i> *50    |
|                    | <i>LehoDAB</i> *28    |                    | <i>LehoDAB</i> *51    |
|                    | <i>LehoDAB</i> *31    |                    | <i>LehoDAB</i> *54    |
|                    | <i>LehoDAB</i> *33    |                    | <i>LehoDAB</i> *55    |
|                    | <i>LehoDAB</i> *35    |                    | <i>LehoDAB</i> *62    |
|                    | <i>LehoDAB</i> *36    |                    | <i>LehoDAB</i> *64    |
| <i>LehoDAB</i> *37 | <i>LehoDAB</i> *70    |                    |                       |
| <i>LehoDAB</i> *38 | <i>LehoDAB</i> *73    |                    |                       |

Supplementary Table 3. Summary of Mantel test results of isolation by distance at microsatellite markers, the MHC class II-DAB gene and the DAB supertypes

| Marker type     | R <sup>2</sup> | <i>P</i> -value |
|-----------------|----------------|-----------------|
| Microsatellites | 0.224          | 0.329           |
| DAB             | 0.356          | 0.199           |
| DAB supertypes  | 0.445          | 0.107           |

Supplementary Table 4. Population differentiation across 5 ESUs at MHC class II-DAB supertypes generated from cluster analysis based on positively selected sites predicted only from Mixed Effect Model of Evolution (MEME)

|                     | Brynderwyn<br>Range | Northern<br>Coromandel | Central<br>Coromandel | Southern<br>Coromandel | Otawa |
|---------------------|---------------------|------------------------|-----------------------|------------------------|-------|
| Brynderwyn Range    |                     | 0.175                  | 0.026                 | 0.327                  | 0.808 |
| Northern Coromandel | 0.077               |                        | 0.029                 | 0.011                  | 0.313 |
| Central Coromandel  | 0.013               | 0.011                  |                       | 0.127                  | 0.544 |
| Southern Coromandel | 0.129               | 0.004                  | 0.045                 |                        | 0.190 |
| Otawa               | 0.513               | 0.234                  | 0.357                 | 0.149                  |       |

$D_{EST}$  above diagonal (Jost 2008);  $G'_{ST}$  below diagonal (Hedrick 2005)
